# Supplementary material for: Effective activation of peroxymonosulfate to degrade p -nitrophenol (PNP) by Co–B–O–C amorphous materials prepared from 150 to 600 °C and room temperature Co–B–O–C solution catalysts
Source: Royal Society of Chemistry journal article supplement (doi:10.1039/d5nj04924e), 2026-01-01
Supplement: d5nj04924e1.pdf [file d5nj04924e1.pdf]

## **Effective activation of peroxymonosulfate to degrade p-nitrophenol (PNP) by Co-B-O-C amorphous materials prepared from 150 to 600 °C and room temperature Co-B-O-C solution catalysts**

Yingda Zhang, Yadan Wang, Yuying Zhang, Xiaochun Li, Yun Li, Pingyun Li\*, Xiaode Guo\*

National Special Superfine Powder Engineering Research Centre, School of Chemistry and Chemical Engineering, Nanjing University of Science and Technology, Nanjing 210094, China.

\*Corresponding author. Tel. 0086-025-84315050. E-mail: lipingyun@njust.edu.cn (Pingyun Li) guoxiaodenj@sina.com (Xiaode Guo)

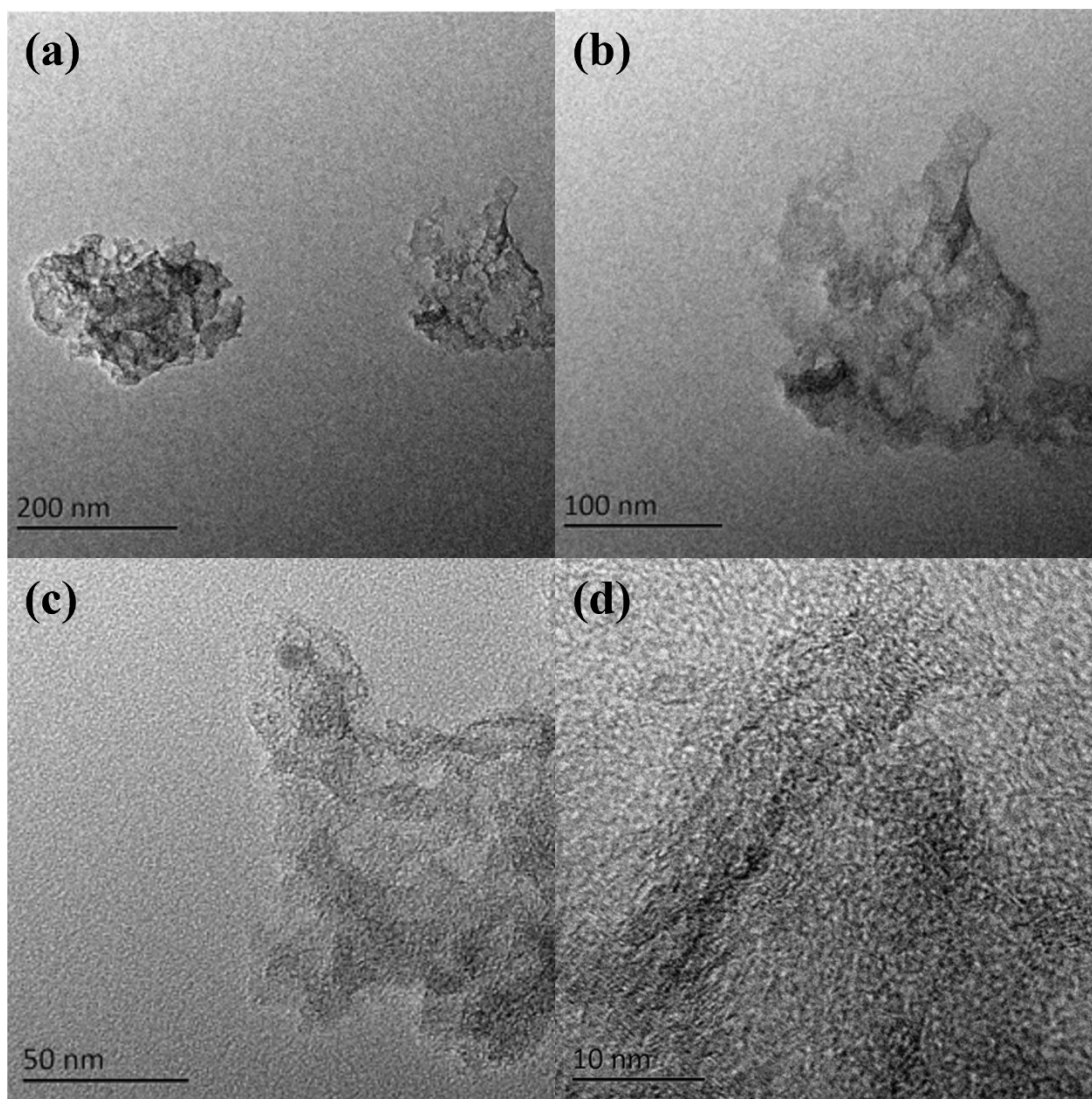

Figure S1. TEM image of the Co-B-O-C- citric acid catalyst.

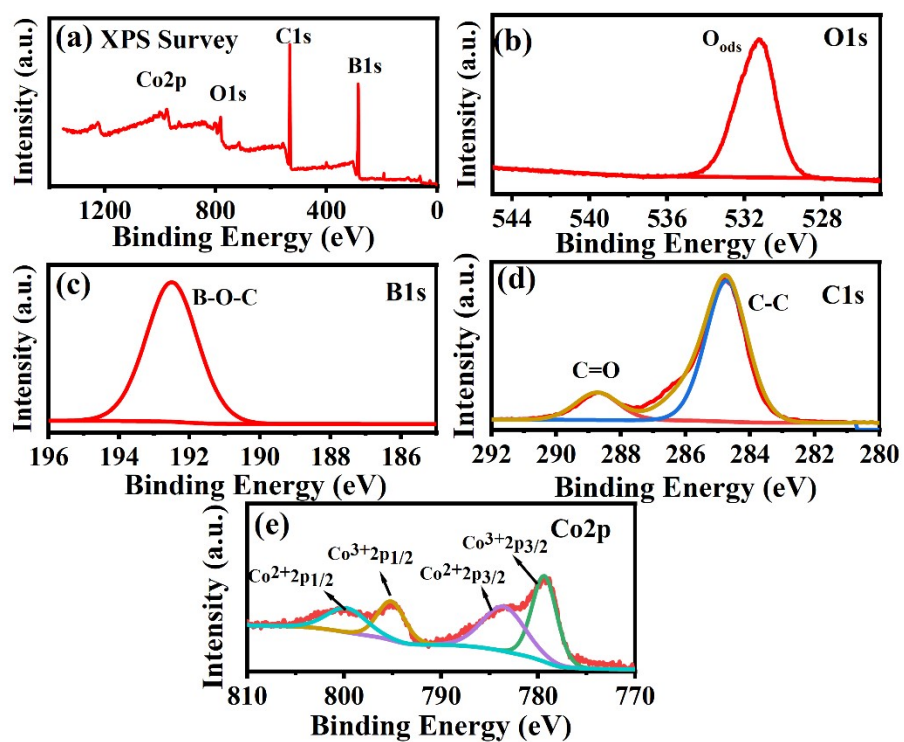

Figure S2. XPS spectrum of Co-B-O-C-citric acid-300.

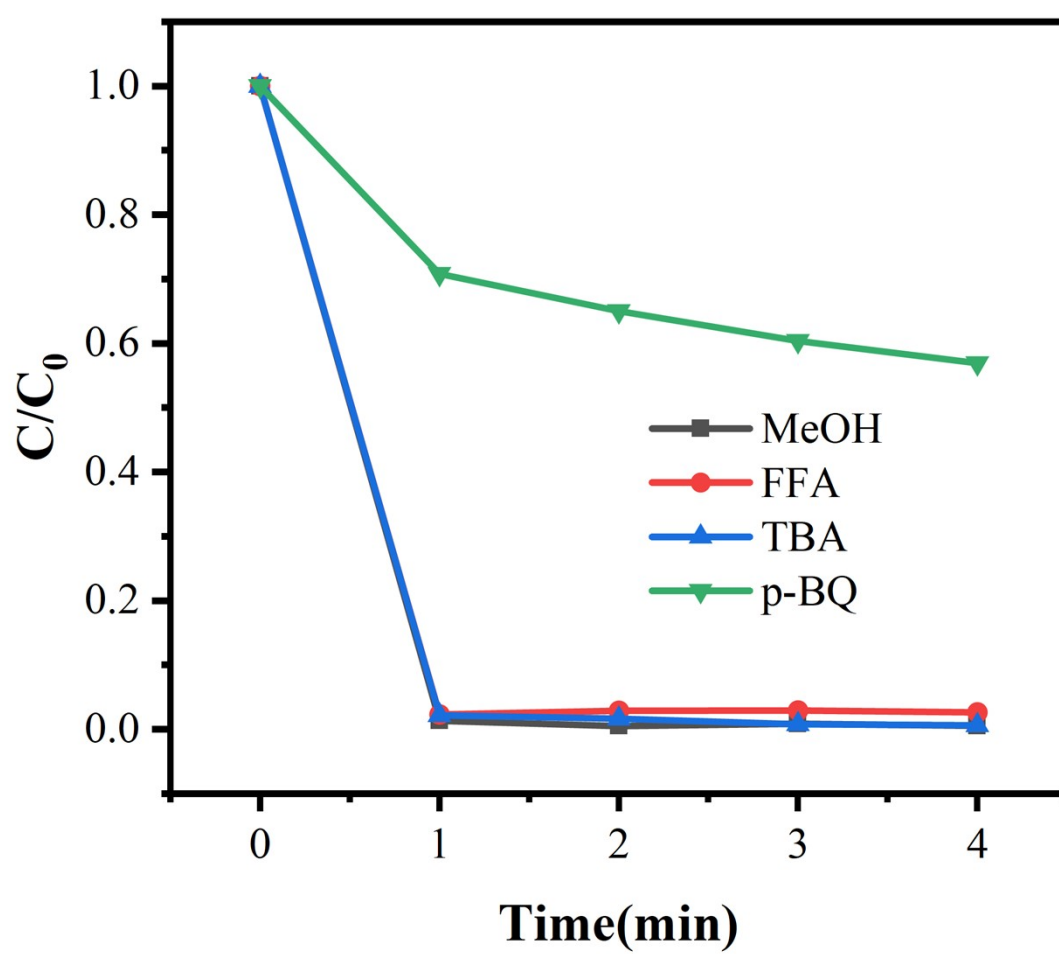

Figure S3. Radical quenching experiment of Co-B-O-C-600°C-Glucose. Experimental condition: pH=7, PMS =1.8mM, PNP=0.09mM, catalyst=0.2mg, quencher=36mM.

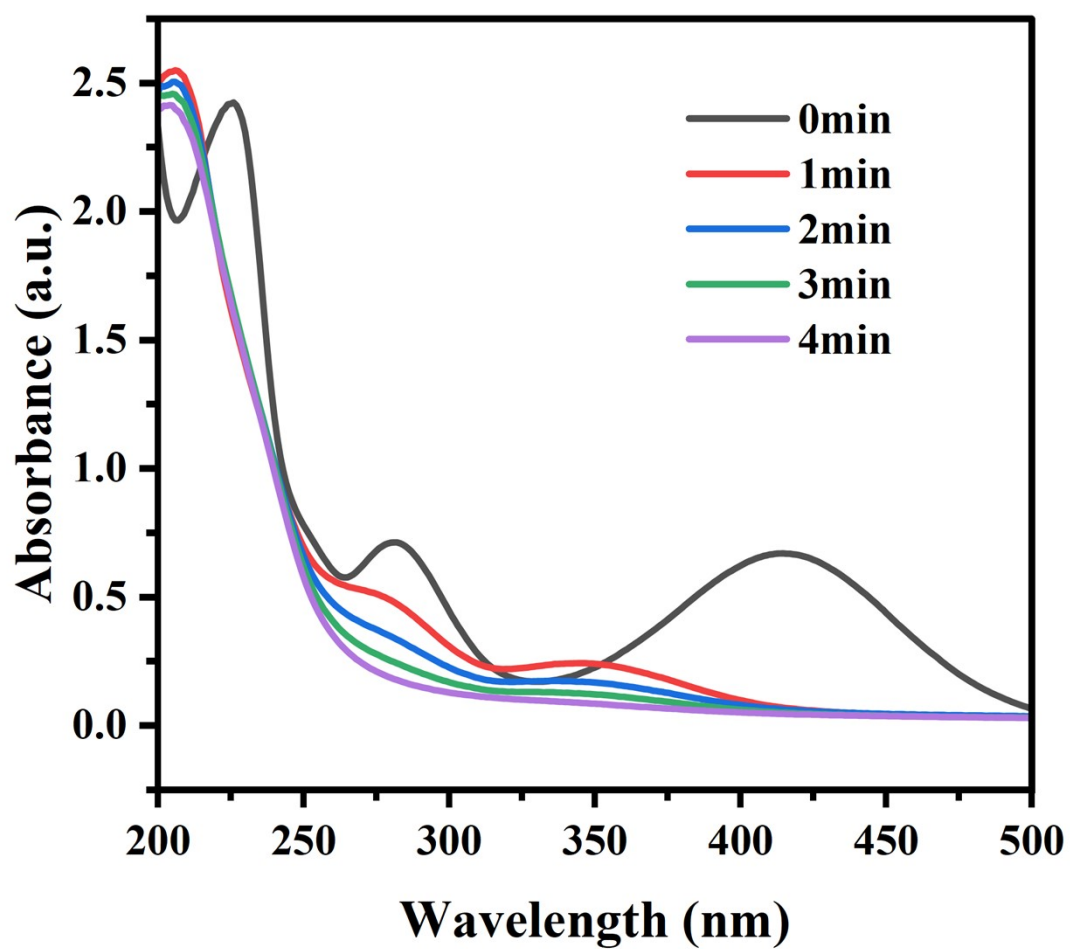

Figure S4. Co-B-O-C-citric acid-300 activates PMS to degrade 2-NP. Experimental condition: pH=7, PMS =1.8mM, 2-NP =12.5 mg/L, catalyst=0.2mg.

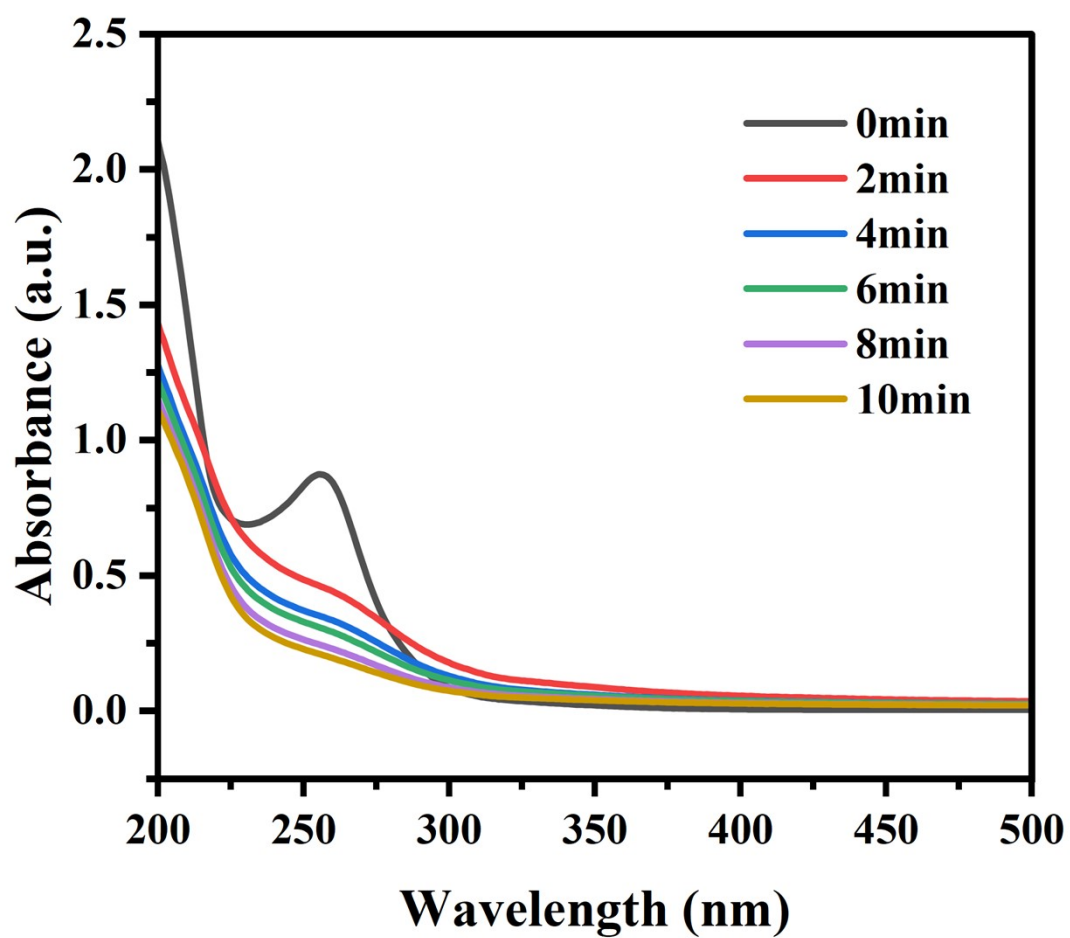

Figure S5. Co-B-O-C-citric acid-300 activates PMS to degrade SMX. Experimental condition: pH=7, PMS =1.8mM, SMX =10 mg/L, catalyst=0.2mg.

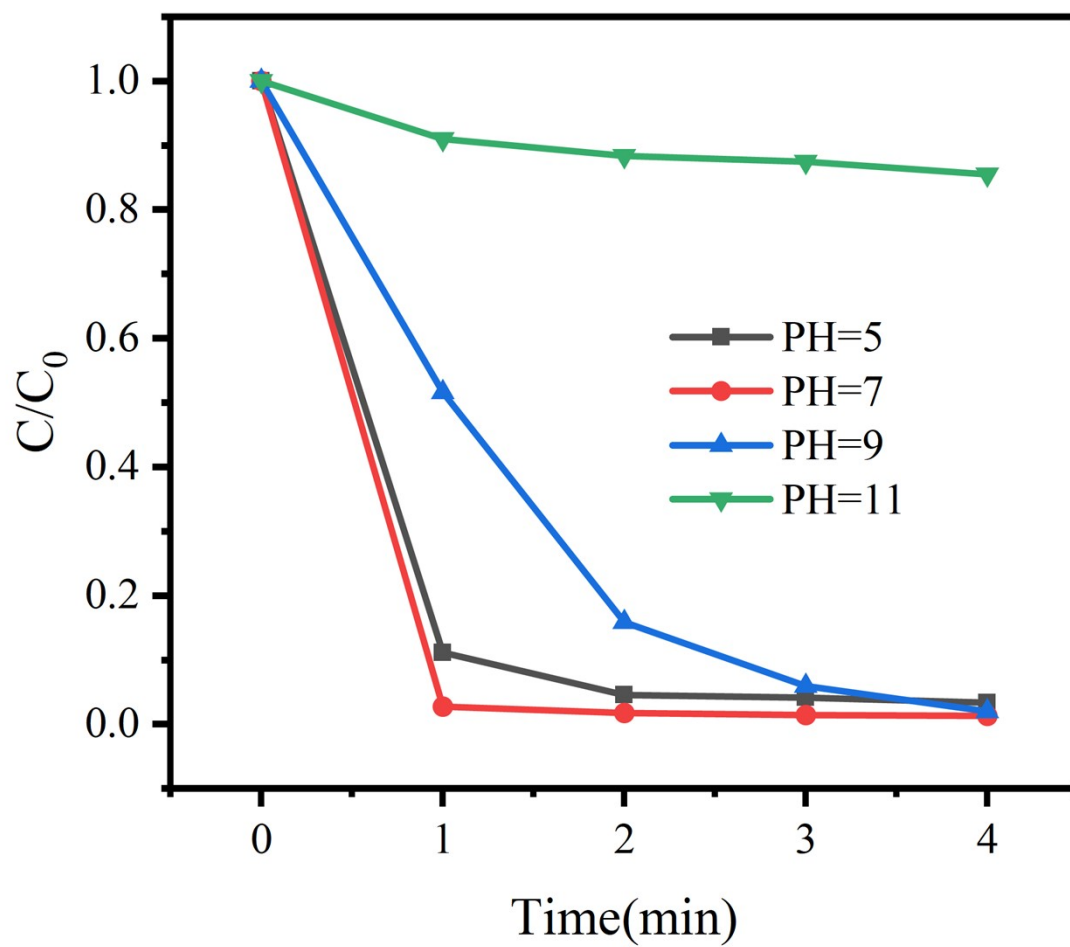

Figure S6. Effect of Co-B-O-C-600°C-Glucose on PNP degradation under different pH conditions, PMS = 1.8 mM, PNP = 0.09 mM, and Co-B-O-C-600°C-Glucose = 0.2 mg.

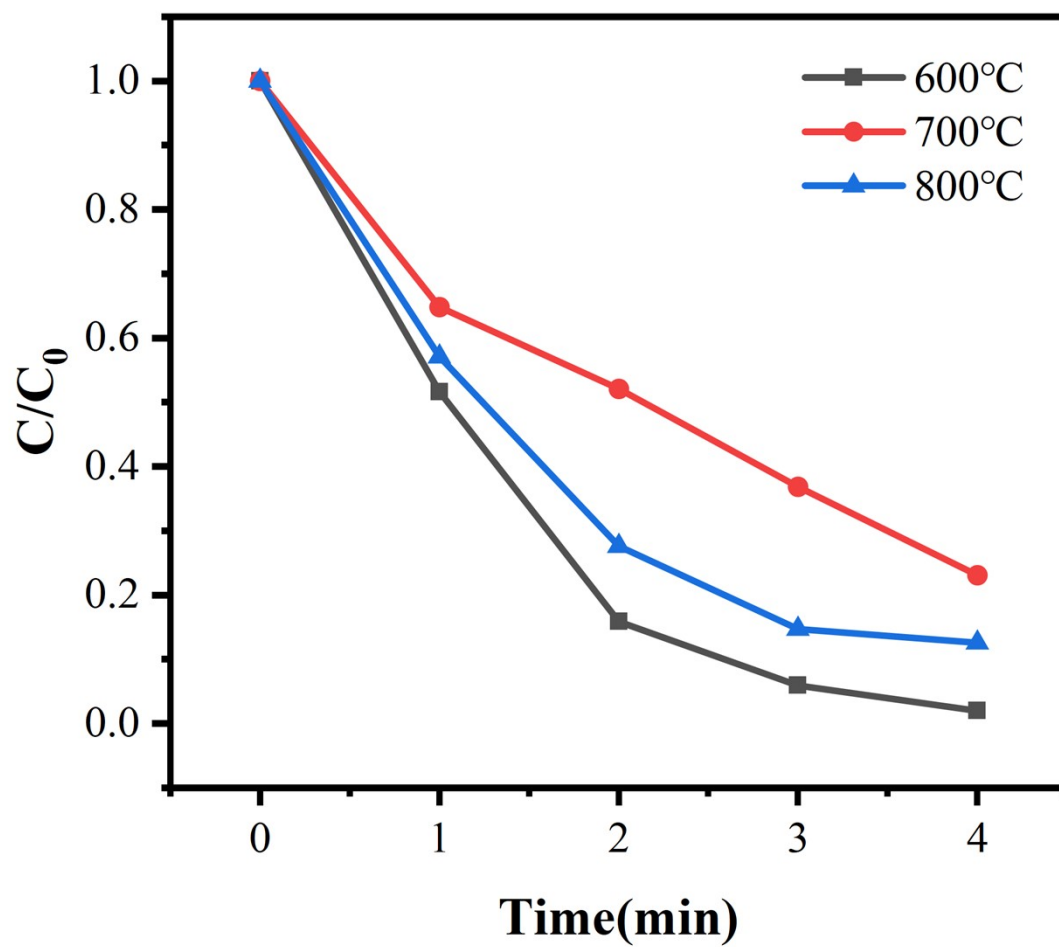

Figure S7. Degradation of PNP by Co-B-O-C -Glucose catalysts at different calcination temperatures, pH = 9, PMS = 1.8 mM, PNP = 0.09 mM, and Co-B-O-C-Glucose = 0.2 mg.

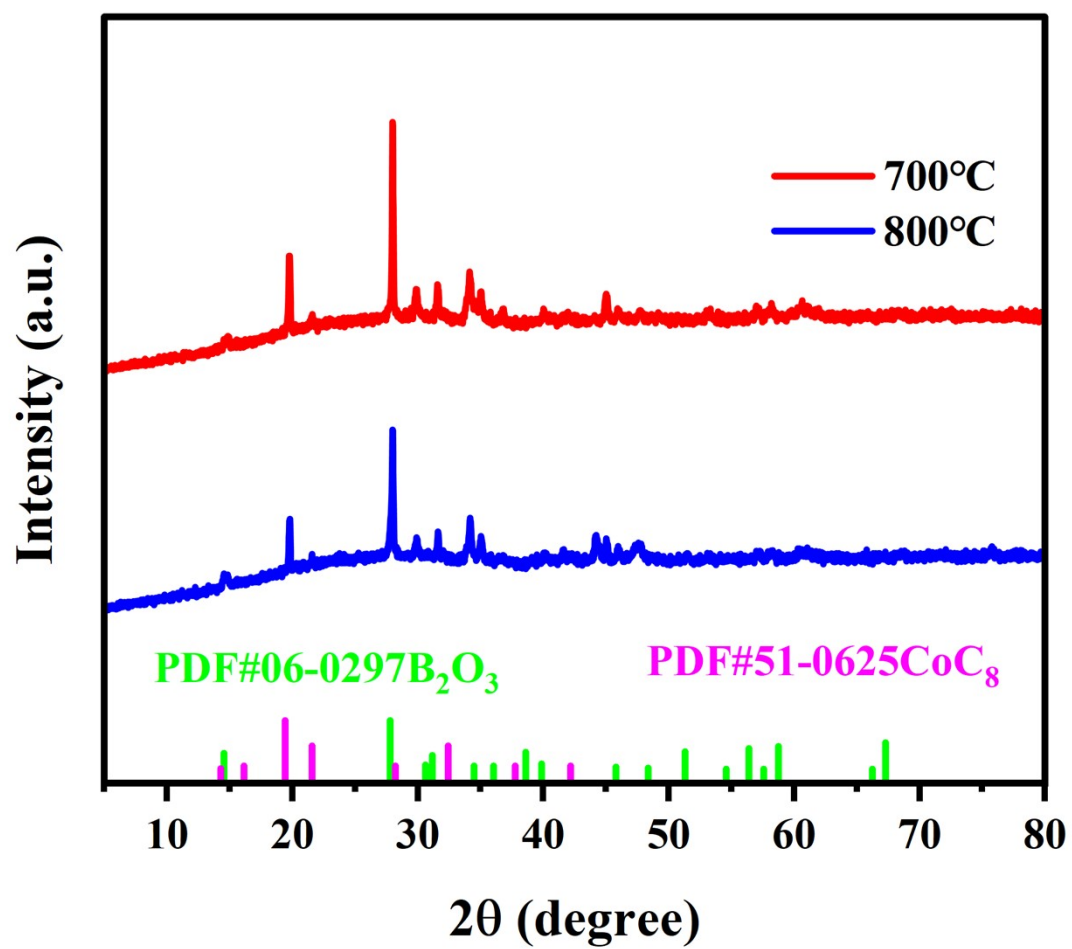

Figure S8. XRD profiles of Co-B-O-C-Glucose catalysts prepared at 700 and 800 °C.

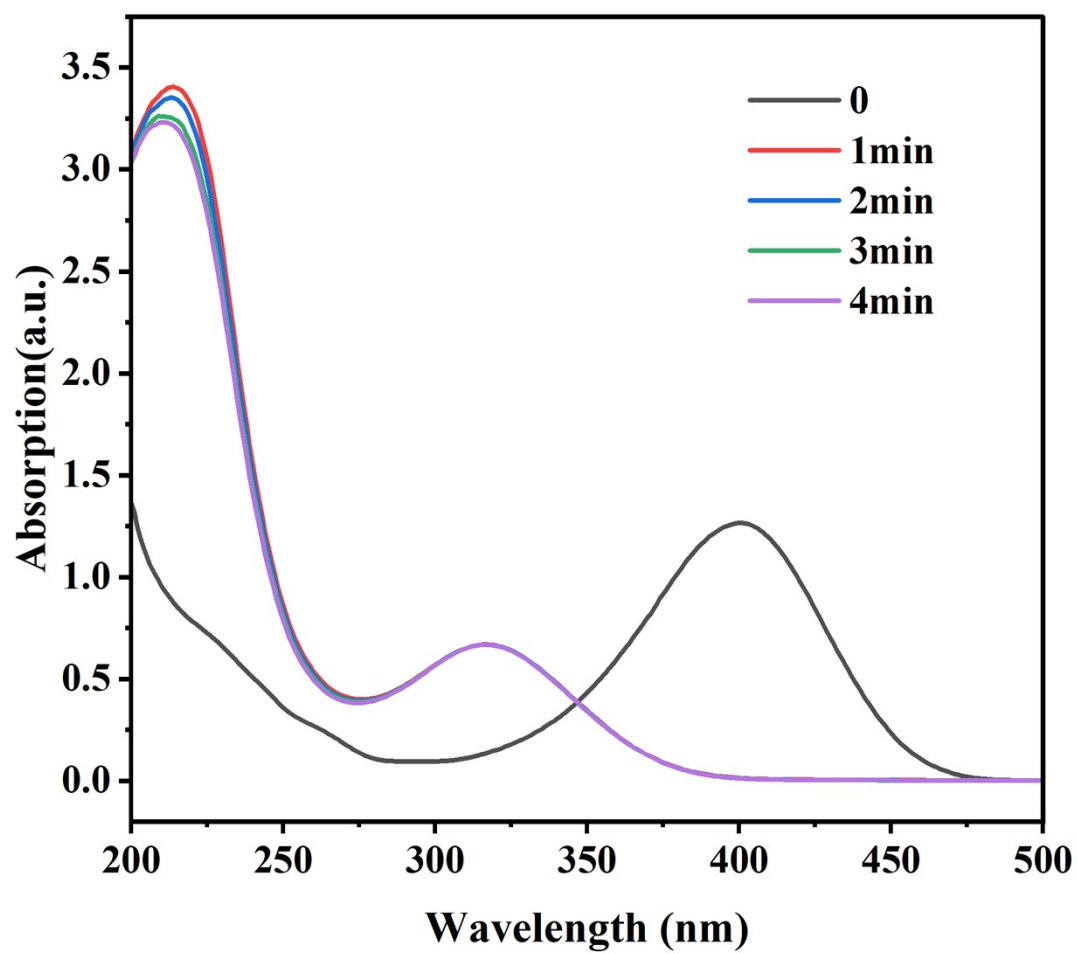

Figure S9. B-O-C- Citric acid without Co in the raw material degrades PNP. pH = 7, PMS = 1.8 mM, PNP = 0.09 mM, and B-O-C- Citric acid = 0.2 mg.

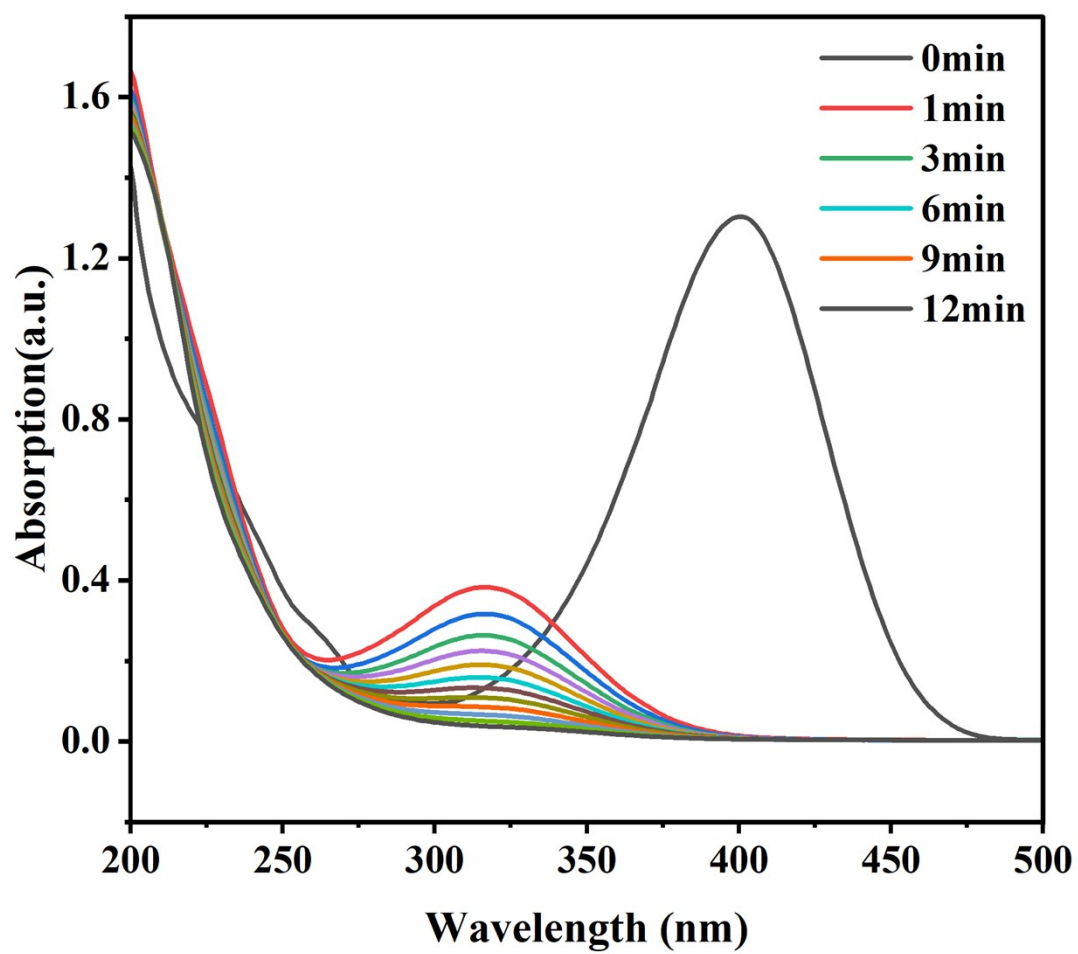

Figure S10. Co-O-C- Citric acid without B in the raw material degrades PNP. pH = 7  
PMS = 1.8 mM, PNP = 0.09 mM, and B-O-C- Citric acid = 0.2 mg.

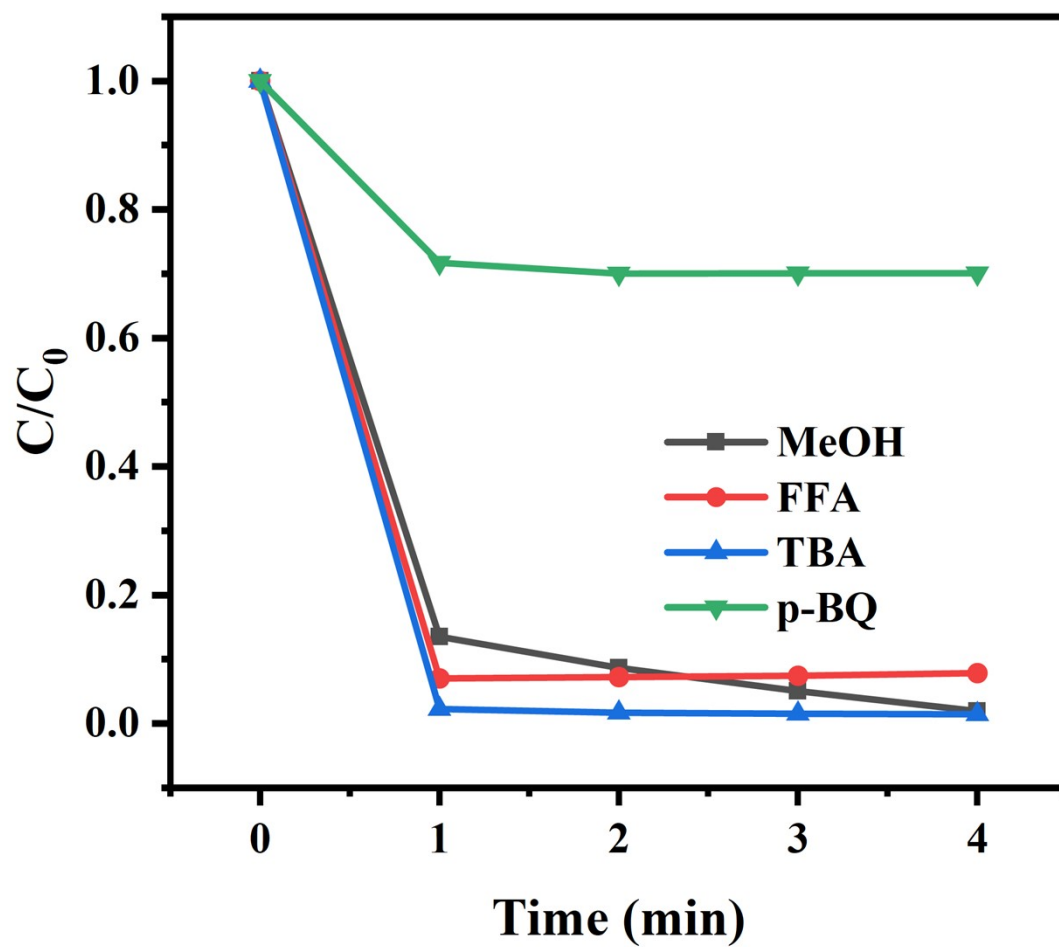

Figure S11. Radical quenching experiment of Co-B-O-C-300°C-Citric acid. pH = 9, PMS = 1.8 mM, PNP = 0.09 mM, catalyst = 0.2 mg, quencher = 36 mM.
